# Supplementary material for: Transcriptional Analysis of Shewanella oneidensis MR-1 with an Electrode Compared to Fe(III)Citrate or Oxygen as Terminal Electron Acceptor
Source: PLOS journal article supplement (doi:10.1371/journal.pone.0030827), 2012-02-01
Supplement: S2 (10.1371/journal.pone.0030827.s002) [file journal.pone.0030827.s002]

**Figure S2. Illustration of genome-wide gene expression fold change.**

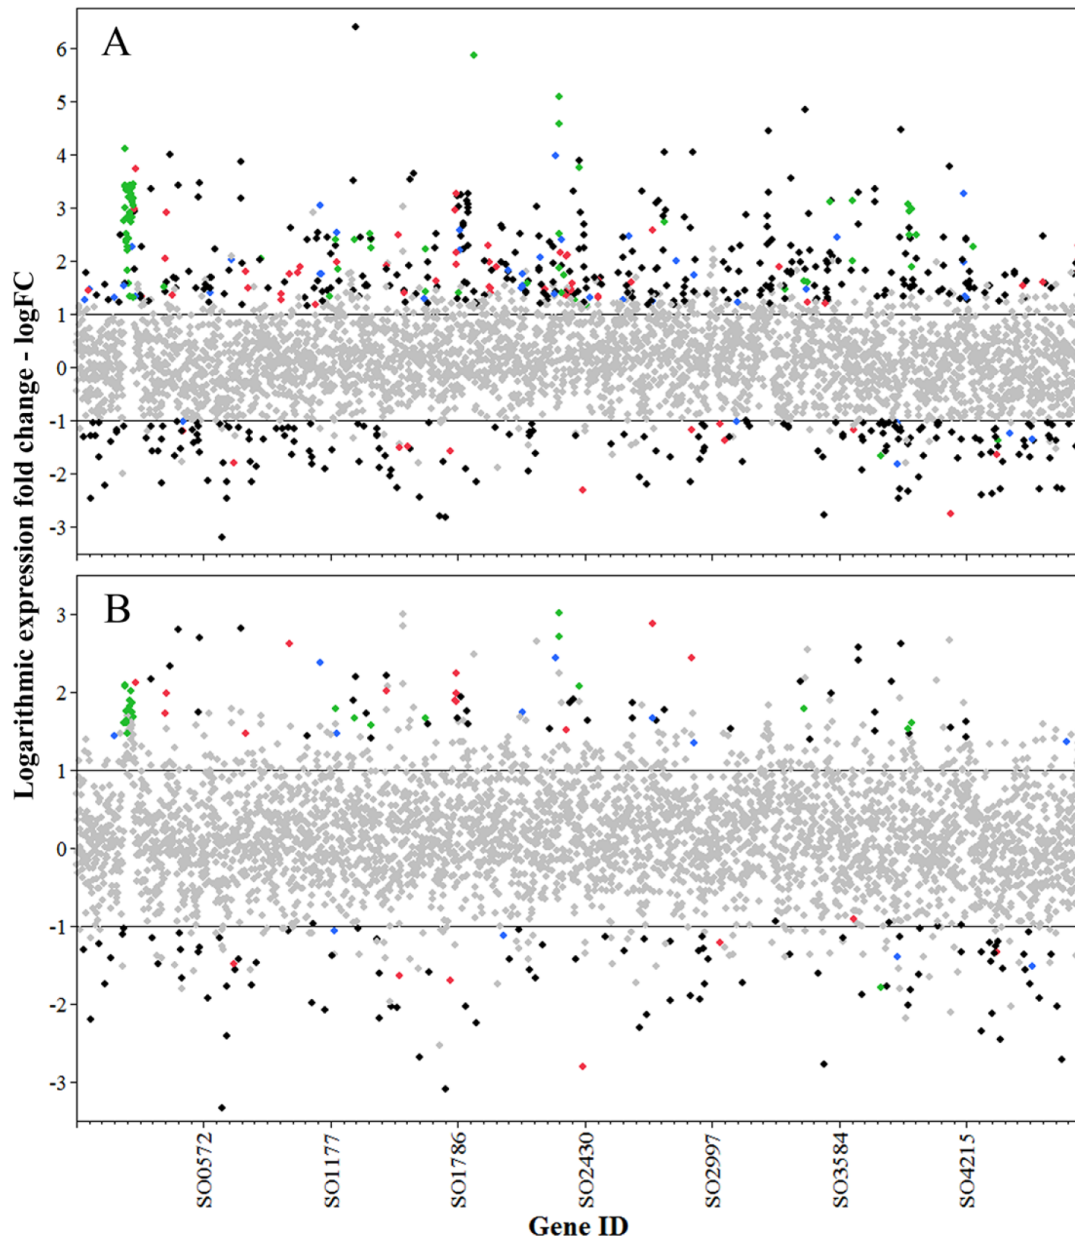

Panel A: Results of Comparison 1 – El vs. Fe; Panel B: Results of Comparison 2 – El. vs. O<sub>2</sub>. With **grey**: Genes that did not change expression levels with statistical significance (fdr (q)-value threshold  $\leq 0.05$  in (A) and  $\leq 0.2$  in (B)) or where  $|\logFC| < 1$ . Colored dots show significantly changed genes of the following functional groups: **red** - "Energy Metabolism"; **green** - "Protein Synthesis"; **blue** - "Protein Fate"; **black** - all other functional groups. Positive log<sub>2</sub> Fold Change (logFC) values indicate increased expression with the electrode, negative logFC values indicate increased expression with the other electron acceptor.
