# Supplementary material for: Transcriptional Analysis of Shewanella oneidensis MR-1 with an Electrode Compared to Fe(III)Citrate or Oxygen as Terminal Electron Acceptor
Source: PLoS One. 2012 Feb 1;7(2):e30827. doi: 10.1371/journal.pone.0030827 (PMC3271074; doi:10.1371/journal.pone.0030827)
Supplement: Table S1 — Differentially expressed genes with fdr≤0.05 and |logFC|>1 for Comparison 1: respiration with a carbon electrode (0.4 V vs. SHE) vs. soluble iron(III) citrate; sorted by the Gene-ID. (XLS) [file pone.0030827.s004.xls]

## Sheet: Tabelle2
Table S1. Differentially expressed genes with fdr ≤ 0.05 and |logFC| > 1 for Comparison 1: respiration with a carbon electrode (0.4 V vs. SHE) vs. soluble iron(III) citrate; sorted by the Gene-ID.
log2(Fold Change)	Gene ID	Fig. 2	Gene annotation	Functional Group	p(BH)-value
-1.30494	SO0028	*	potassium uptake protein TrkH	Transport and Binding Protein	2.17046e-07
1.27272	SO0032		polypeptide deformylase	Protein Fate	0.0132799
1.77438	SO0035		smg protein	Unknown Function	1.998e-05
1.44561	SO0049	*	phosphoglycerate mutase	Energy Metabolism	0.030197
1.47699	SO0052	*	protein-export protein SecB	Protein Fate	0.00476785
-2.4609	SO0058	*	potassium uptake protein	Transport and Binding Protein	0.00078549
-1.28341	SO0059	*	transcriptional regulatory protein KdpE	Signal Transduction	4.05963e-08
-1.02694	SO0068		hypothetical protein	hypothetical protein	0.00021876
-1.27583	SO0078		hypothetical protein	hypothetical protein	5.04435e-07
1.3492	SO0084		HAD-superfamily hydrolase	Unknown Function	0.00935488
-1.04107	SO0091		hypothetical protein	hypothetical protein	8.47045e-05
-1.0376	SO0092		purine nucleoside phosphorylase	Purines; Pyrimidines; Nucleosides; and Nucleotides	0.0184806
-1.67217	SO0093	*	NupC family protein	Transport and Binding Protein	4.48536e-06
1.56523	SO0119		DUF1090 family protein	Unknown Function	0.00267312
-2.20252	SO0122	*	probable homoserine/homoserine lactone or amino acid efflux protein	Transport and Binding Protein	1.05379e-05
1.26085	SO0139	*	ferritin	Transport and Binding Protein	0.0303458
-1.3952	SO0154		conserved hypothetical protein	Unknown Function	1.40781e-05
1.31892	SO0169	*	general secretion pathway protein G	Protein Fate	0.00960449
-1.17225	SO0180		Conserved protein in Shewanella (AER)	hypothetical protein	0.00421188
-1.21696	SO0181		hypothetical protein	hypothetical protein	0.00267312
1.22482	SO0191		cysQ protein	Central intermediary metabolism	0.0341323
2.49956	SO0197		fatty acid desaturase	Fatty acid and phospholipid metabolism	7.8584e-11
-1.10344	SO0215	*	pantothenate kinase	Biosynthesis of cofactors; prosthetic groups; and carriers	5.00084e-05
2.7521	SO0217		translation elongation factor Tu	Protein Synthesis	1.3056e-11
1.54177	SO0218		preprotein translocase	Protein Fate	0.0325622
1.59136	SO0219	*	transcription antitermination protein NusG	Transcription	0.00189612
4.10005	SO0220	*	ribosomal protein L11	Protein Synthesis	4.5996e-14
3.42454	SO0221	*	ribosomal protein L1	Protein Synthesis	2.86074e-09
3.3901	SO0222	*	ribosomal protein L10	Protein Synthesis	1.9849e-13
3.00889	SO0223	*	ribosomal protein L7/L12	Protein Synthesis	2.1866e-18
3.32564	SO0226	*	ribosomal protein S12	Protein Synthesis	1.26925e-05
2.401	SO0227	*	ribosomal protein S7	Protein Synthesis	5.6037e-11
2.51267	SO0228	*	translation elongation factor G	Protein Synthesis	3.1554e-13
2.36231	SO0229	*	translation elongation factor Tu	Protein Synthesis	8.36464e-07
1.82426	SO0230	*	ribosomal protein S10	Protein Synthesis	1.96233e-05
2.81258	SO0231	*	ribosomal protein L3	Protein Synthesis	1.5371e-15
2.20969	SO0232	*	ribosomal protein L4	Protein Synthesis	1.69066e-09
1.82209	SO0233	*	ribosomal protein L23	Protein Synthesis	3.34588e-06
2.27027	SO0234	*	ribosomal protein L2	Protein Synthesis	3.3039e-12
3.20266	SO0235	*	ribosomal protein S19	Protein Synthesis	2.4759e-14
2.77646	SO0236	*	ribosomal protein L22	Protein Synthesis	6.8197e-20
2.43963	SO0237	*	ribosomal protein S3	Protein Synthesis	3.6605e-14
2.42855	SO0238	*	ribosomal protein L16	Protein Synthesis	7.5201e-14
1.57348	SO0239	*	ribosomal protein L29	Protein Synthesis	0.00015665
1.33593	SO0240	*	ribosomal protein S17	Protein Synthesis	0.01857
3.27949	SO0241	*	ribosomal protein L14	Protein Synthesis	3.40777e-08
3.42776	SO0242	*	ribosomal protein L24	Protein Synthesis	4.9613e-11
2.91195	SO0243	*	ribosomal protein L5	Protein Synthesis	1.29609e-08
2.74036	SO0244	*	ribosomal protein S14	Protein Synthesis	6.7653e-15
3.37635	SO0245	*	ribosomal protein S8	Protein Synthesis	7.045e-28
3.26606	SO0246	*	ribosomal protein L6	Protein Synthesis	7.4814e-33
3.42464	SO0247	*	ribosomal protein L18	Protein Synthesis	5.8188e-33
2.74423	SO0248	*	ribosomal protein S5	Protein Synthesis	7.7756e-19
3.10785	SO0249	*	ribosomal protein L30	Protein Synthesis	7.0841e-21
2.82216	SO0250	*	ribosomal protein L15	Protein Synthesis	3.5039e-23
2.2771	SO0251	*	preprotein translocase	Protein Fate	2.7627e-10
3.37613	SO0252	*	ribosomal protein L36	Protein Synthesis	6.7161e-21
3.43473	SO0253	*	ribosomal protein S13	Protein Synthesis	6.1423e-28
3.05258	SO0254	*	ribosomal protein S11	Protein Synthesis	3.7936e-15
3.1883	SO0255	*	ribosomal protein S4	Protein Synthesis	9.9184e-30
1.31245	SO0257	*	ribosomal protein L17	Protein Synthesis	0.0136643
2.98679	SO0259	*	cytochrome c biogenesis protein CcmE	Energy Metabolism	7.1458e-19
2.93652	SO0260	*	heme exporter protein CcmD	Transport and Binding Protein	1.669e-12
1.84163	SO0263	*	heme exporter protein CcmA	Transport and Binding Protein	0.0256435
3.7364	SO0264	*	ScyA	Energy Metabolism	3.8458e-29
1.33974	SO0267		DsbE	Protein Fate	0.00776597
1.35132	SO0286		shikimate kinase	Amino acid biosynthesis	0.00748487
1.31466	SO0287		3-dehydroquinate synthase	Amino acid biosynthesis	0.0113587
2.27466	SO0291		hypothetical protein	hypothetical protein	0.000164
1.32906	SO0292	*	ribulose-phosphate 3-epimerase	Energy Metabolism	0.0328621
-1.32777	SO0314		ornithine decarboxylase	Central intermediary metabolism	9.93722e-05
1.25815	SO0326		Conserved protein in Shewanella	hypothetical protein	0.0268466
3.3584	SO0334		conserved hypothetical protein	conserved hypothetical protein	1.7066e-29
-1.10325	SO0335		DUF904 family protein	Unknown Function	0.00052378
-1.5715	SO0341	*	sensory box protein (PAS domain)	Regulatory Functions	3.5908e-12
-1.5758	SO0363		Nucleoside-diphosphate-sugar pyrophosphorylase	hypothetical protein	1.24828e-06
-1.34667	SO0386		DNA-binding protein	Unknown Function	1.48738e-05
-2.17863	SO0387		hypothetical protein	hypothetical protein	0.00012811
-1.09966	SO0391		Conserved protein	hypothetical protein	1.44281e-05
1.50394	SO0394	*	putative tRNA-dihydrouridine synthase	Protein Synthesis	0.00325877
1.42212	SO0400		conserved hypothetical protein	conserved hypothetical protein	0.00549647
2.04937	SO0401	*	alcohol dehydrogenase	Energy Metabolism	0.00010944
1.6088	SO0405	*	transcription termination factor Rho	Transcription	0.00070166
2.91455	SO0406	*	thioredoxin 1	Energy Metabolism	4.1191e-14
4.00741	SO0417	*	pilin protein PilA	Cell Envelope	2.3616e-44
1.35129	SO0432	*	aconitate hydratase 2	Energy Metabolism	0.0307485
1.68424	SO0433	*	regulator of sigma D	Regulatory Functions	0.00035757
-1.64808	SO0440		Conserved protein; an outer membrane lipoprotein	conserved hypothetical protein	0.0389789
1.66945	SO0447		hypothetical protein	Unknown Function	0.03296
1.4879	SO0448		hypothetical protein	Unknown Function	0.0216311
-1.0042	SO0450	*	major facilitator superfamily protein	Transport and Binding Protein	0.0008474
3.42712	SO0458		hypothetical protein	hypothetical protein	2.0419e-24
-1.5145	SO0470		hypothetical protein	hypothetical protein	7.20914e-08
-1.19981	SO0473		mitomycin resistance protein	Cellular Processes	0.0070226
-1.18791	SO0476	*	CcmG-2	Energy Metabolism	0.00089581
-1.19763	SO0478	*	CcmF-2	Energy Metabolism	0.00879128
-1.0121	SO0481		peptidyl-prolyl cis-trans isomerase	Protein Fate	0.00142224
1.80083	SO0508		hypothetical protein	hypothetical protein	0.00064179
-1.17165	SO0523	*	transcriptional regulator	Regulatory Functions	0.0470488
-1.42102	SO0529	*	trpba operon transcriptional activator	Regulatory Functions	0.0329732
-1.01387	SO0540		conserved hypothetical protein	conserved hypothetical protein	0.0129189
1.49843	SO0543		Conserved protein in Shewanella	hypothetical protein	0.00208749
-1.2578	SO0544	*	sensory box histidine kinase (PAS domain)	Signal Transduction	8.64286e-05
-1.36619	SO0549		chemotaxis protein CheY/response regulator receiver domain protein	Cellular Processes	2.481e-06
-1.10402	SO0550		hypothetical protein	hypothetical protein	7.35586e-05
3.19457	SO0552		hypothetical protein	hypothetical protein	1.6134e-20
3.4749	SO0554		Conserved protein	Unknown Function	1.5415e-12
-1.58996	SO0555		Conserved protein with FOG: EAL domain	conserved hypothetical protein	1.606e-11
1.47884	SO0576		PhoH family protein	Unknown Function	0.00620415
1.55472	SO0581		hypothetical protein	hypothetical protein	0.0001906
-2.11644	SO0589		integral membrane domain protein	Unknown Function	0.00148625
1.22405	SO0595		Conserved protein in Shewanella	Unknown Function	0.021219
1.70078	SO0603		host factor-I protein	Regulatory Functions	7.35586e-05
1.4987	SO0604		GTP-binding protein HflX	Unknown Function	0.00200686
1.39713	SO0605		hflK protein	Protein Fate	0.00545734
1.70029	SO0611	*	stringent starvation protein a	Cellular Processes	3.67017e-05
2.22531	SO0624	*	catabolite gene activator	Regulatory Functions	0.0151675
-1.06996	SO0650		hypothetical prophage MuSo1 protein	hypothetical protein	0.0107813
-3.18531	SO0660		hypothetical prophage MuSo1 protein (similar to SO2972)	hypothetical protein	6.2402e-07
-1.7855	SO0663		prophage MuSo1	conserved hypothetical protein	0.00321032
-1.08426	SO0666		prophage MuSo1	Mobile and extrachromosomal element functions	1.26732e-05
1.37563	SO0671		hypothetical prophage MuSo1 protein	hypothetical protein	0.0137111
-1.08014	SO0675		prophage MuSo1	Mobile and extrachromosomal element functions	0.00226446
-2.15635	SO0677		prophage MuSo1	conserved hypothetical protein	7.9859e-05
-2.44873	SO0678		prophage MuSo1	hypothetical protein	7.7735e-17
-1.13502	SO0690		type II DNA modification methyltransferase	DNA Metabolism	0.00080758
1.83443	SO0691		Conserved protein in Shewanella (UV	Unknown Function	1.52609e-07
2.02905	SO0704	*	chaperonin GroEL	Protein Fate	0.0123304
-1.78381	SO0716	*	hypothetical monoheme cytochrome c	Energy Metabolism	1.04367e-05
-1.13232	SO0742	*	iron(III) ABC transporter	Transport and Binding Protein	0.0035044
3.17544	SO0752		hypothetical protein	hypothetical protein	0.00080425
3.85619	SO0753		hypothetical protein	hypothetical protein	2.71813e-09
1.95779	SO0755		Conserved protein in Shewanella	Unknown Function	1.64065e-08
1.18369	SO0756		phospho-2-dehydro-3-deoxyheptonate aldolase	Amino acid biosynthesis	0.0375222
1.80704	SO0770	*	malate dehydrogenase	Energy Metabolism	3.94756e-07
1.50133	SO0780		glycine cleavage system H protein	Energy Metabolism	0.00065103
-1.21356	SO0786		expressed protein in Shewanella (AER)	hypothetical protein	0.00017083
-1.34592	SO0787		hypothetical protein	hypothetical protein	8.42751e-07
-1.77108	SO0791	*	transcriptional regulator	Regulatory Functions	0.0250764
-2.14807	SO0797		hypothetical periplasmic protein	hypothetical protein	3.51991e-07
-1.85404	SO0823		subfamily M50A unassigned peptidases	conserved hypothetical protein	1.9339e-10
2.02786	SO0837		beta-lactamase	Cellular Processes	0.0161048
2.04267	SO0842		translation elongation factor G	Protein Synthesis	5.42229e-07
-1.35189	SO0852		conserved hypothetical protein with pilin-like leader sequence	hypothetical protein	1.69777e-05
1.48277	SO0874		DnaK suppressor protein	DNA Metabolism	0.00664666
-1.15735	SO0914		S12 family peptidase	conserved hypothetical protein	0.00334951
1.38101	SO0930		transketolase	Energy Metabolism	0.00831748
1.27054	SO0932	*	phosphoglycerate kinase	Energy Metabolism	0.0307699
-1.15236	SO0936	*	transcriptional regulator	Regulatory Functions	0.00089119
-1.27838	SO0946	*	conserved hypothetical protein	Transport and Binding Protein	6.24955e-05
1.61202	SO0947	*	ATP-dependent RNA helicase SrmB	Transcription	0.00048003
-1.13017	SO0962		conserved hypothetical protein	conserved hypothetical protein	1.27757e-05
1.76037	SO0970		FccA	Energy Metabolism	0.00582367
2.61896	SO0974		hypothetical protein	Unknown Function	4.1315e-10
-1.64038	SO0986		chromate transporter	Transport and Binding Protein	2.43886e-05
-1.38611	SO0994		conserved hypothetical protein	Unknown Function	1.73646e-05
-1.14686	SO0997		transcriptional regulator	Regulatory Functions	1.38027e-05
1.78221	SO1013	*	NADH dehydrogenase I	Energy Metabolism	0.00078245
1.8984	SO1020	*	NADH dehydrogenase I	Energy Metabolism	0.0103668
1.32525	SO1051		periplasmic glucan biosynthesis protein	Cellular Processes	0.0372085
2.40056	SO1060		Antigen I/II family collagen-binding surface adhesin SpaP	Unknown Function	3.1242e-12
1.16676	SO1063		slyX protein	Unknown Function	0.0328284
-1.56907	SO1070	*	catalase	Cellular Processes	0.00879128
-1.05683	SO1081		hypothetical protein	conserved hypothetical protein	0.0103329
-1.68741	SO1090		ApbE family protein	Biosynthesis of cofactors; prosthetic groups; and carriers	0.0209536
-1.81552	SO1091	*	membrane protein	Cell Envelope	0.00017083
1.49945	SO1101	*	autoinducer-2 production protein LuxS	Cellular Processes	0.0005601
1.18655	SO1105	*	NqrC-2 NADH:ubiquinone oxidoreductase	Energy Metabolism	0.0418838
2.4285	SO1110		conserved hypothetical protein	Unknown Function	1.15936e-05
2.52472	SO1111	*	bacterioferritin subunit 2	Transport and Binding Protein	6.6552e-10
1.62531	SO1112	*	bacterioferritin subunit 1	Transport and Binding Protein	5.07567e-05
3.03736	SO1126	*	chaperone protein DnaK	Protein Fate	9.28085e-09
1.76428	SO1127		chaperone protein DnaJ	Protein Fate	0.0305259
1.76213	SO1139		peptidyl-prolyl cis-trans isomerase FklB	Protein Fate	1.82057e-05
1.43092	SO1140		dihydrodipicolinate reductase	Amino acid biosynthesis	0.0484692
1.42579	SO1141		carbamoyl-phosphate synthase	Purines; Pyrimidines; Nucleosides; and Nucleotides	0.00379269
1.25151	SO1142		carbamoyl-phosphate synthase	Purines; Pyrimidines; Nucleosides; and Nucleotides	0.0294468
-1.89306	SO1154		hypothetical protein	hypothetical protein	1.46786e-06
1.44501	SO1163		conserved protein	conserved hypothetical protein	0.00371753
2.44128	SO1164		penicillin-binding protein 6	Cell Envelope	1.065e-14
1.32664	SO1174	*	leucyl-tRNA synthetase	Protein Synthesis	0.037962
2.13678	SO1175		conserved protein	Unknown Function	4.0511e-10
1.49076	SO1178		magnesium and cobalt efflux protein CorC	Transport and Binding Protein	0.0010578
-1.55431	SO1182		hypothetical protein	hypothetical protein	0.00078549
2.40989	SO1196	*	ribosomal RNA large subunit methyltransferase J	Protein Synthesis	2.405e-15
2.28812	SO1197	*	FtsH endopeptidase	Cellular Processes	8.5091e-13
1.97414	SO1200	*	triosephosphate isomerase	Energy Metabolism	7.30878e-07
2.54254	SO1201	*	preprotein translocase	Protein Fate	2.5549e-13
1.83593	SO1207	*	ribosomal protein S15	Protein Synthesis	0.0012423
1.62381	SO1209	*	polyribonucleotide nucleotidyltransferase	Transcription	0.00160583
1.43978	SO1286		DNA primase	DNA Metabolism	0.012409
3.50915	SO1287		Conserved GatB/Yqey protein	Unknown Function	5.2375e-23
2.39438	SO1288	*	ribosomal protein S21	Protein Synthesis	4.4399e-05
6.39431	SO1295		major outer membrane lipoprotein	Cell Envelope	4.965e-116
-1.04991	SO1302	*	chloride channel protein	Transport and Binding Protein	0.00019536
1.33161	SO1306		Conserved protein	Unknown Function	0.0100454
-1.75943	SO1310		glutamyl endopeptidase (plant)	Unknown Function	0.00244584
2.45219	SO1317		Conserved protein in Shewanella	hypothetical protein	9.51933e-09
1.70792	SO1327		histidine-containing phosphotransfer domain Of Arcb	Unknown Function	0.00054679
-1.10948	SO1329		adenylate cyclase-related protein	Unknown Function	0.0489077
1.53676	SO1337		Conserved protein	Unknown Function	0.00086113
1.55603	SO1343	*	sigma-E factor negative regulatory protein RseA	Regulatory Functions	0.0222185
1.52679	SO1344	*	sigma-E factor regulatory protein RseB	Regulatory Functions	0.00724898
2.50643	SO1357	*	ribosomal protein S16	Protein Synthesis	9.2126e-16
2.42336	SO1358	*	16S rRNA processing protein RimM	Transcription	1.564e-10
2.41015	SO1359	*	tRNA (guanine-N1)-methyltransferase	Protein Synthesis	8.3547e-10
2.23823	SO1360	*	ribosomal protein L19	Protein Synthesis	8.4868e-10
-1.28358	SO1383	*	ATP-dependent RNA helicase	Transcription	0.00463691
-1.2504	SO1385		methyl-accepting chemotaxis protein (PAS domain)	Cellular Processes	1.25484e-07
-1.14163	SO1387		HD domain protein (similar to many response regulators)	Unknown Function	0.00086113
-1.51487	SO1395	*	membrane protein	Cell Envelope	1.77752e-09
-1.87354	SO1396		conserved hypothetical protein	conserved hypothetical protein	0.018113
-1.64979	SO1420	*	outer membrane porin	Transport and Binding Protein	0.00972707
1.85544	SO1428	*	mtrB-like outer membrane protein	Cell Envelope	0.043589
1.9046	SO1429	*	anaerobic dimethyl sulfoxide reductase	Energy Metabolism	0.0422648
1.52664	SO1445	*	transcriptional regulator	Regulatory Functions	0.00686624
-2.02525	SO1448	*	site-specific recombinase	DNA Metabolism	0.0134874
-1.92779	SO1453		conserved hypothetical protein	conserved hypothetical protein	0.0177837
-2.25003	SO1486		cytosolic long-chain acyl-CoA thioester hydrolase family protein	Fatty acid and phospholipid metabolism	4.16115e-05
1.72951	SO1489		Conserved protein in Shewanella	Unknown Function	0.00411595
2.48764	SO1490	*	alcohol dehydrogenase II	Energy Metabolism	0.00014559
-1.4943	SO1495		putative glycosyl hydrolase	Energy Metabolism	0.0004525
3.02114	SO1520	*	Fe-S oxidoreductase, L-lactate dyhydrogenase (lldE)	Energy Metabolism	0.0295676
1.41322	SO1521	*	iron-sulfur cluster-binding protein, D-lactate dehydrogenase (dld-II)	Energy Metabolism	0.00349001
1.45186	SO1525	*	deoxyxylulose-5-phosphate synthase	Biosynthesis of cofactors; prosthetic groups; and carriers	0.00143327
1.23505	SO1527	*	exodeoxyribonuclease VII	DNA Metabolism	0.0283616
-1.48727	SO1538	*	isocitrate dehydrogenase	Energy Metabolism	6.98542e-06
1.9218	SO1550		Conserved protein	conserved hypothetical protein	2.68373e-07
3.53827	SO1551		GGDEF domain protein	Unknown Function	1.0679e-38
-1.52568	SO1557	*	outer membrane porin	Transport and Binding Protein	0.00812403
3.64579	SO1572		hypothetical protein	Unknown Function	8.5074e-38
1.38207	SO1581		phnA protein	Unknown Function	0.00394877
-2.43391	SO1606		alkyl sulfatase (metallo-beta-lactamase superfamily protein)	Unknown Function	8.4197e-18
1.29349	SO1627		methionyl aminopeptidase 1	Protein Fate	0.0302475
2.22405	SO1629	*	ribosomal protein S2	Protein Synthesis	0.00081457
2.22415	SO1630	*	translation elongation factor Ts	Protein Synthesis	1.74256e-07
1.41739	SO1632	*	ribosome recycling factor	Protein Synthesis	0.00155912
1.68964	SO1638		outer membrane protein OmpH	Cell Envelope	0.00224345
1.97013	SO1639		UDP-3-O-(3-hydroxymyristoyl) glucosamine n-acyltransferase	Cell Envelope	2.73521e-05
1.20889	SO1640		(3R)-hydroxymyristoyl-(acyl-carrier-protein) dehydratase	Fatty acid and phospholipid metabolism	0.0474889
-1.0374	SO1643	*	ribonuclease HII	Transcription	0.0433332
2.24042	SO1673	*	anaerobically induced outer membrane protein OmpW	Cell Envelope	0.00130019
2.50929	SO1675		Conserved protein in bacteria	conserved hypothetical protein	2.12179e-06
1.61607	SO1678		methylmalonate-semialdehyde dehydrogenase	Energy Metabolism	0.0131762
1.51241	SO1683		3-oxoacyl-(acyl-carrier-protein) reductase	Fatty acid and phospholipid metabolism	0.0030326
-2.78797	SO1695	*	sensory box/GGDEF family protein	Regulatory Functions	0.0129547
-1.76373	SO1711		hypothetical protein	hypothetical protein	8.45151e-05
-2.81135	SO1720		DedA family protein	Unknown Function	6.5613e-13
-1.57297	SO1748	*	hypothetical protein with one type c heme binding motif	Energy Metabolism	0.00748835
2.96093	SO1776	*	MtrB	Energy Metabolism	3.5892e-13
2.16702	SO1777	*	MtrA	Energy Metabolism	5.40334e-05
1.93063	SO1778	*	MtrC/OmcB	Energy Metabolism	2.69057e-06
3.27732	SO1779	*	OmcA	Energy Metabolism	8.3076e-21
3.21208	SO1783	*	ferrous iron transport protein A	Transport and Binding Protein	2.5238e-24
1.30172	SO1784	*	ferrous iron transport protein B	Transport and Binding Protein	0.0131884
3.02996	SO1787		Conserved membrane protein with 5 transmembrane domains	Unknown Function	6.2713e-17
1.39985	SO1791	*	cysteinyl-tRNA synthetase	Protein Synthesis	0.0016816
2.57587	SO1794	*	endopeptidase Clp (type 1) ATP-dependent Clp protease	Protein Fate	1.8822e-15
2.20221	SO1795	*	ATP-dependent Clp protease	Protein Fate	9.61405e-07
3.24808	SO1797		DNA-binding protein	DNA Metabolism	4.2921e-25
2.46292	SO1799	*	molybdenum-pterin-binding-protein	Transport and Binding Protein	3.8035e-14
2.70121	SO1807		phage shock protein A	Cellular Processes	2.7735e-16
2.66979	SO1808		phage shock protein B	Cellular Processes	1.37004e-09
2.21732	SO1809		phage shock protein C	Cellular Processes	6.54838e-06
1.6081	SO1814		Conserved protein; chromosomally linked to DNA metabolism genes dinG and primosal replication factor N	hypothetical protein	0.00035452
-1.90659	SO1815		histone deacetylase/AcuC/AphA family protein	Unknown Function	0.0125396
1.26564	SO1816		Conserved protein	Unknown Function	0.0275948
1.5756	SO1821	*	outer membrane porin	Transport and Binding Protein	0.00858491
3.13632	SO1824	*	Conserved protein; chromosomally linked to TonB system transport genes exbB2	Transport and Binding Protein	6.8197e-20
2.90806	SO1825	*	MotA/TolQ/ExbB proton channel family protein	Transport and Binding Protein	1.2041e-19
2.9941	SO1826	*	TonB system transport protein ExbB2	Transport and Binding Protein	2.2354e-17
3.0645	SO1827	*	TonB system transport protein ExbD2	Transport and Binding Protein	3.3168e-26
3.27038	SO1828	*	TonB2 protein	Transport and Binding Protein	1.3573e-20
2.29088	SO1829		TPR domain protein	Unknown Function	2.0895e-12
5.86691	SO1855	*	ribosome modulation factor	Protein Synthesis	7.151e-26
1.42014	SO1856		3-hydroxydecanoyl-(acyl-carrier-protein) dehydratase	Fatty acid and phospholipid metabolism	0.0190804
1.21732	SO1860	*	DNA-binding response regulator	Signal Transduction	0.0233029
-2.14638	SO1866		Conserved membrane protein with 5 transmembrane domains	hypothetical protein	0.00364275
1.20494	SO1867		Protein conserved in bacteria	Unknown Function	0.0418437
1.35379	SO1908		hypothetical protein	hypothetical protein	0.0262212
2.00265	SO1909		conserved hypothetical protein	conserved hypothetical protein	2.11932e-06
2.29006	SO1926	*	citrate synthase	Energy Metabolism	3.3234e-11
1.96994	SO1928	*	succinate dehydrogenase	Energy Metabolism	7.473e-05
1.51245	SO1929	*	succinate dehydrogenase	Energy Metabolism	0.0350822
1.41192	SO1932	*	succinyl-CoA synthase	Energy Metabolism	0.0114754
1.49566	SO1933	*	succinyl-CoA synthase	Energy Metabolism	0.00103037
1.39907	SO1935	*	regulator of nucleoside diphosphate kinase Rnk	Regulatory Functions	0.0125445
1.83296	SO1937	*	Fur	Regulatory Functions	0.00027908
-1.12759	SO1955		hypothetical protein	hypothetical protein	2.75227e-05
1.89302	SO1962		MelA	Energy Metabolism	0.00773218
1.98038	SO1985	*	transcriptional activator	Regulatory Functions	0.0303458
2.65918	SO1986	*	RNA polymerase sigma-70 factor	Transcription	0.00140464
2.63272	SO1991		Conserved protein	Unknown Function	1.55425e-08
1.94151	SO2007		Conserved protein	Unknown Function	0.00336834
1.66494	SO2014		conserved protein in bacteria	conserved hypothetical protein	6.81437e-05
1.82936	SO2016	*	heat shock protein HtpG	Protein Fate	0.0484692
1.81328	SO2018		adenylate kinase	Purines; Pyrimidines; Nucleosides; and Nucleotides	0.00258131
-1.26217	SO2030		fragment Maturase; integron/retron-type RNA-directed DNA polymerase; gene truncated by ISSod1-16 and ISSod2-2	hypothetical protein	1.08806e-06
1.64166	SO2044		lactoylglutathione lyase	Central intermediary metabolism	0.00015665
2.16233	SO2063		Conserved protein	Unknown Function	0.0005545
-1.14993	SO2079		hypothetical protein	hypothetical protein	3.335e-05
2.50972	SO2087		integration host factor	DNA Metabolism	3.3326e-09
1.49602	SO2090		HypE	Protein Fate	0.00072733
1.74738	SO2092	*	HypC	Protein Fate	0.0244681
1.54481	SO2093		HypB	Protein Fate	0.00022268
1.50861	SO2096		HyaD	Protein Fate	0.0366946
1.42967	SO2107		periplasmic glucans biosynthesis protein MdoG	Cellular Processes	0.020128
1.41288	SO2110		conserved hypothetical protein	Unknown Function	0.00354335
1.58749	SO2112	*	ribosomal protein L25	Protein Synthesis	0.00751777
1.6244	SO2116		acetyltransferase	Unknown Function	0.00109123
-1.94054	SO2118		SpoIIAA family protein	Unknown Function	0.00030716
-1.28935	SO2121	*	chemotaxis protein CheA	Cellular Processes	0.00077469
-1.20971	SO2124	*	chemotaxis protein methyltransferase CheR (glutamate methyltransferase)	Cellular Processes	0.0107682
-1.0576	SO2141		transposase	Mobile and extrachromosomal element functions	0.00060279
-1.18664	SO2145	*	sensor histidine kinase (cytoplasmic)	Signal Transduction	0.00657668
-1.61078	SO2177		Conserved nucleoid-associated protein	conserved hypothetical protein	2.19781e-05
3.01991	SO2178	*	CcpA	Cellular Processes	0.0484692
1.83223	SO2193	*	DNA-binding response regulator	Signal Transduction	0.00334951
2.47653	SO2194		OmpA family protein (has cheW domain)	Cell Envelope	0.00058029
1.86879	SO2195		inter-alpha-trypsin inhibitor domain protein	Unknown Function	0.00232638
2.07225	SO2196		LPXTG-site transpeptidase family protein (sortase)	Protein Fate	0.0002041
1.20529	SO2197		GGDEF family protein	Unknown Function	0.0427976
1.56681	SO2201		Conserved protein; chromosomally linked to ribosomal protein S6 modification protein	Unknown Function	0.00216428
1.40421	SO2219		Conserved protein in Shewanella	hypothetical protein	0.0247419
1.46655	SO2222	*	fumarate hydratase	Energy Metabolism	0.00532202
1.28098	SO2236		PTS system	Transport and Binding Protein	0.0301709
1.3435	SO2238		phosphocarrier protein HPr	Transport and Binding Protein	0.0105143
2.36635	SO2251		esterase	Unknown Function	9.4464e-11
1.60228	SO2263		Rrf2 family protein	Unknown Function	0.00596882
2.26917	SO2265		IscU scaffold protein for Fe-S cluster assembly	Unknown Function	2.28331e-08
1.9572	SO2266		IscA iron recruitment protein (Fe-S assembly)	Unknown Function	0.00022268
1.37005	SO2268		chaperone protein HscA	Protein Fate	0.0329732
3.96825	SO2277	*	16 kDa heat shock protein A	Protein Fate	9.6184e-13
1.43065	SO2279		acetolactate synthase III	Amino acid biosynthesis	0.0154351
1.86911	SO2299	*	threonyl-tRNA synthetase	Protein Synthesis	0.00012205
5.08745	SO2300	*	translation initiation factor IF-3	Protein Synthesis	5.9365e-47
4.57353	SO2301	*	ribosomal protein L35	Protein Synthesis	6.1332e-11
2.50638	SO2302	*	ribosomal protein L20	Protein Synthesis	0.0153223
2.16386	SO2304		alanine dehydrogenase	Energy Metabolism	0.00022166
1.91749	SO2309		crcB protein	Unknown Function	3.34588e-06
1.39599	SO2310		seryl-tRNA synthetase	Protein Synthesis	0.03767
2.39453	SO2312	*	serine protease inhibitor	Protein Fate	0.0314213
1.74587	SO2328		translation elongation factor P	Protein Synthesis	0.00063377
1.38846	SO2330	*	flavodoxin	Energy Metabolism	0.00834166
1.40011	SO2335		seqA protein	DNA Metabolism	0.0055243
1.35521	SO2336	*	phosphoglucomutase	Energy Metabolism	0.00664666
2.0916	SO2339	*	alpha keto acid dehydrogenase complex	Energy Metabolism	3.76988e-06
1.43161	SO2340	*	alpha keto acid dehydrogenase complex	Energy Metabolism	0.0146784
1.39834	SO2341	*	alpha keto acid dehydrogenase complex	Energy Metabolism	0.0129189
2.10388	SO2345	*	glyceraldehyde 3-phosphate dehydrogenase	Energy Metabolism	3.3326e-09
1.80041	SO2356	*	electron transport regulator a	Regulatory Functions	7.98141e-07
1.46909	SO2361	*	CcoP	Energy Metabolism	0.00139827
1.44419	SO2363	*	CcoO	Energy Metabolism	0.0132571
1.57126	SO2364	*	cytochrome c oxidase	Energy Metabolism	0.00200231
1.36965	SO2374	*	transcriptional regulator	Regulatory Functions	0.00664666
3.30698	SO2375		integral IM membrane protein	Cell Envelope	2.6828e-29
1.27778	SO2379		DsrC-like protein	Protein Synthesis	0.042787
-1.29175	SO2387		conserved hypothetical protein	conserved hypothetical protein	0.00303448
1.42131	SO2396		conserved hypothetical protein	Unknown Function	0.00196951
3.88201	SO2401		integration host factor	DNA Metabolism	2.1123e-17
3.76228	SO2402	*	ribosomal protein S1	Protein Synthesis	4.3471e-14
2.23462	SO2403		cytidylate kinase	Purines; Pyrimidines; Nucleosides; and Nucleotides	9.35871e-05
2.91833	SO2407		conserved hypothetical protein	Unknown Function	0.0464774
-2.29432	SO2417	*	iron-sulfur cluster-binding protein	Energy Metabolism	0.0303458
1.23446	SO2422		conserved hypothetical protein	Unknown Function	0.0209536
1.89529	SO2423		hypothetical protein	Unknown Function	1.58816e-05
2.49396	SO2424		zinc carboxypeptidase domain protein	Unknown Function	5.0844e-13
2.6834	SO2426	*	DNA-binding response regulator	Signal Transduction	0.0146515
2.25356	SO2427	*	TonB-dependent receptor	Transport and Binding Protein	1.64057e-07
1.18001	SO2433		aspartyl-tRNA synthetase	Protein Synthesis	0.0404778
1.65161	SO2435		methyltransferase	Unknown Function	0.00167859
1.49118	SO2436		methyltransferase	Unknown Function	0.00274911
1.30537	SO2447		channel protein	Protein Fate	0.00806289
1.70099	SO2474		carbonic anhydrase family protein (zn center)	Unknown Function	6.53728e-05
1.31672	SO2487		6-phosphogluconate dehydratase	Energy Metabolism	0.0147298
1.32865	SO2489		glucose-6-phosphate 1-dehydrogenase	Energy Metabolism	0.0229505
1.60919	SO2490	*	transcriptional regulator	Regulatory Functions	0.00577694
1.65308	SO2491	*	pyruvate kinase II	Energy Metabolism	0.00571738
1.70132	SO2499		Conserved protein in Shewanella	Unknown Function	0.00156717
1.56287	SO2506		excinuclease ABC	DNA Metabolism	0.00031478
-1.43556	SO2551		transcriptional regulator-related protein	Unknown Function	0.0246285
1.77439	SO2583		Methyltransferase	hypothetical protein	0.00071259
1.2686	SO2601		C-terminal processing protease-1	Protein Fate	0.0275305
2.44103	SO2602		Activator of osmoprotectant transporter ProP	conserved hypothetical protein	7.0384e-11
2.07194	SO2604		YebG family protein	conserved hypothetical protein	0.00093071
-1.25259	SO2607		spore maturation protein A-related protein	Unknown Function	0.00011812
1.5347	SO2618		ATP-binding protein	Unknown Function	0.00843606
1.40271	SO2622		Conserved protein	conserved hypothetical protein	0.00495991
2.46452	SO2626	*	ATP-dependent Clp protease	Protein Fate	4.8806e-13
1.75145	SO2627		ATP-dependent Clp protease adaptor protein ClpS	conserved hypothetical protein	0.00039862
1.41633	SO2637		Conserved protein in Shewanella	Unknown Function	0.012409
1.59466	SO2638		leucine dehydrogenase	Energy Metabolism	0.0127005
2.18029	SO2644	*	phosphoenolpyruvate synthase	Transport and Binding Protein	0.00258131
1.31254	SO2645		Conserved protein in bacteria	Unknown Function	0.00959161
-2.05939	SO2673		prophage MuSo2	hypothetical protein	4.6713e-17
3.31056	SO2682		prophage MuSo2 hypothetical protein	hypothetical protein	7.4814e-33
1.86394	SO2683		prophage MuSo2	hypothetical protein	5.5107e-05
-1.29541	SO2691		prophage MuSo2	hypothetical protein	0.00054177
-2.18039	SO2703		prophage MuSo2	conserved hypothetical protein	1.24451e-05
1.1702	SO2705		DNA topoisomerase I	DNA Metabolism	0.0458059
1.25093	SO2722		HGG motif-containing thioesterase	conserved hypothetical protein	0.0133332
1.41812	SO2723		HIT family protein	Unknown Function	0.0453571
2.57812	SO2727	*	STC small tetraheme cytochrome c	Energy Metabolism	5.4348e-13
1.24749	SO2730		family S51 unassigned peptidases	Protein Fate	0.0222693
-1.56819	SO2744		helicase	Unknown Function	0.00812392
1.84985	SO2746		Conserved protein	Unknown Function	1.47978e-05
3.0923	SO2747		peptidoglycan-associated lipoprotein	Cell Envelope	1.3257e-18
1.38071	SO2748		tolB protein	Transport and Binding Protein	0.012409
1.86042	SO2749		tolA protein	Transport and Binding Protein	0.00040257
3.13745	SO2756	*	antioxidant	Cellular Processes	5.922e-18
2.84977	SO2775		acyl carrier protein	Fatty acid and phospholipid metabolism	1.2254e-21
2.198	SO2776		3-oxoacyl-(acyl-carrier-protein) reductase	Fatty acid and phospholipid metabolism	1.1692e-10
2.74383	SO2780	*	ribosomal protein L32	Protein Synthesis	3.9782e-10
4.04567	SO2781		Metal-binding/nucleic acid-binding protein	Unknown Function	1.755e-30
2.94531	SO2787	*	cold shock domain family protein	Cellular Processes	6.9021e-12
1.52794	SO2791		cytidine deaminase	Purines; Pyrimidines; Nucleosides; and Nucleotides	0.00062073
-1.675	SO2803		DNA internalization-related competence protein ComEC/Rec2	Cellular Processes	0.00066509
1.18601	SO2827		Conserved protein	Unknown Function	0.0477006
1.25438	SO2829		conserved domain protein	hypothetical protein	0.0365093
1.99462	SO2842		subfamily M23B unassigned peptidases	Protein Fate	1.18193e-06
1.38618	SO2877		conserved hypothetical protein (putative DNA replication factor)	Unknown Function	0.0207919
1.25195	SO2878		Conserved protein in bacteria	Unknown Function	0.0469191
1.52346	SO2880		glutaredoxin domain protein	Unknown Function	0.0283616
2.82696	SO2881	*	superoxide dismutase	Cellular Processes	2.7187e-19
1.64651	SO2882		Ser-protein kinase	conserved hypothetical protein	0.0130524
-2.14719	SO2905	*	O-methyltransferase	Cellular Processes	0.00310497
2.62575	SO2907		TonB-dependent receptor domain protein	Unknown Function	0.00770954
-1.17503	SO2912	*	PflB	Energy Metabolism	0.0296513
4.04092	SO2918		hypothetical protein	hypothetical protein	1.4656e-28
1.42589	SO2921		FolX	Biosynthesis of cofactors; prosthetic groups; and carriers	0.0142388
1.72608	SO2924		subfamily S26A unassigned peptidases	Protein Fate	3.516e-05
2.01854	SO2929		Conserved protein in Shewanella	Unknown Function	0.00089119
-1.31399	SO2941		prophage LambdaSo	Mobile and extrachromosomal element functions	9.93722e-05
-1.73143	SO2945		prophage LambdaSo	hypothetical protein	0.0012175
-1.05841	SO2957		prophage LambdaSo	conserved hypothetical protein	0.00069086
-1.56124	SO2959		prophage LambdaSo	hypothetical protein	1.49348e-09
-1.11489	SO2966		prophage LambdaSo	conserved hypothetical protein	0.0169834
-1.50229	SO2967		prophage LambdaSo	conserved hypothetical protein	0.00571738
1.38715	SO2975		prophage LambdaSo	hypothetical protein	0.0197023
-1.05521	SO3034	*	ferric iron reductase protein (extra domain at n-terminus)	Energy Metabolism	0.0157569
1.44694	SO3052		methyl-accepting chemotaxis protein	Cellular Processes	0.0134702
1.97031	SO3054		metallo-beta-lactamase family protein	Unknown Function	0.00155912
-1.35977	SO3057		Pal/histidase family protein	Energy Metabolism	0.0487579
1.26762	SO3069		Conserved protein	Cell Envelope	0.0447143
1.84764	SO3072		3-oxoacyl-(acyl-carrier-protein) synthase I	Fatty acid and phospholipid metabolism	9.57511e-06
-1.31224	SO3073		Glycine/D-amino acid oxidase	conserved hypothetical protein	0.0189265
2.22116	SO3085		conserved domain protein	hypothetical protein	7.8123e-11
-1.02424	SO3106		subfamily S8A unassigned peptidases (cold-active serine alkaline protease)	Protein Fate	0.00054177
1.37947	SO3109		conserved hypothetical protein (1 heme motif)	Unknown Function	0.0392715
1.22725	SO3112		preprotein translocase	Protein Fate	0.0398869
1.80543	SO3115		hypothetical protein	hypothetical protein	0.0013137
2.29277	SO3119		hypothetical protein	hypothetical protein	0.00027912
-1.76582	SO3131		hypothetical protein	hypothetical protein	6.474e-05
1.45564	SO3140		thymidine kinase	Purines; Pyrimidines; Nucleosides; and Nucleotides	0.00180562
-1.00199	SO3143		conserved hypothetical Na+/H+ antiporter	Transport and Binding Protein	0.00557847
2.86122	SO3146		DNA-binding protein	DNA Metabolism	3.7587e-18
-1.02638	SO3152		acetyltransferase	Unknown Function	4.7481e-05
-1.09943	SO3161		c-terminus SO3167	Unknown Function	0.00414072
1.95147	SO3202		purine-binding chemotaxis protein CheW	Cellular Processes	3.05814e-07
1.35767	SO3205		hypothetical protein	Unknown Function	0.0317761
1.44714	SO3211	*	flagellar biosynthetic protein FlhG	Cellular Processes	0.00086003
1.54712	SO3229	*	flagellar hook-basal body complex protein FliE	Cellular Processes	0.00748835
2.64299	SO3233	*	flagellar protein FliS	Cellular Processes	9.0959e-17
2.30415	SO3234	*	Conserved protein; encoded in flagella locus	Cellular Processes	1.7606e-12
2.84871	SO3235	*	flagellar hook-associated protein FliD	Cellular Processes	8.1222e-15
3.28852	SO3236	*	flagellin FlaG	Cellular Processes	1.7332e-14
4.43382	SO3237	*	flagellin	Cellular Processes	2.6218e-37
2.32542	SO3238	*	flagellin	Cellular Processes	3.36155e-09
1.19696	SO3242	*	flagellar P-ring protein FlgI	Cellular Processes	0.0328746
1.53696	SO3245	*	flagellar basal-body rod protein FlgF	Cellular Processes	0.00151503
1.46675	SO3247	*	flagellar hook protein FlgE	Cellular Processes	0.0113587
1.52799	SO3250	*	flagellar basal-body rod protein FlgB	Cellular Processes	0.0159838
1.6605	SO3252		chemotaxis protein CheV	Cellular Processes	0.0165826
2.39309	SO3254	*	negative regulator of flagellin synthesis FlgM	Regulatory Functions	2.775e-13
1.88887	SO3285	*	cytochrome d ubiquinol oxidase	Energy Metabolism	0.00200231
-1.06398	SO3306	*	sensor histidine kinase	Signal Transduction	0.00392335
1.52971	SO3310		Conserved protein in bacteria	Unknown Function	0.00879128
1.46666	SO3311		histidyl-tRNA synthetase	Protein Synthesis	0.0195441
1.294	SO3312		putative enzyme	Biosynthesis of cofactors; prosthetic groups; and carriers	0.0213617
1.80031	SO3325		nrfJ-related protein (only similar at N-terminus)	Unknown Function	4.32883e-07
-1.09924	SO3331		conserved hypothetical protein	conserved hypothetical protein	0.0240145
-1.12373	SO3335		conserved hypothetical protein	Unknown Function	5.54e-05
1.79625	SO3340		MscS Mechanosensitive ion channel protein predicted to possess 3 transmembrane domains	Transport and Binding Protein	1.05557e-05
1.75259	SO3341		antioxidant	Cellular Processes	0.00026728
2.29885	SO3343		Conserved protein	Unknown Function	1.10576e-06
3.56161	SO3344		hypothetical protein	hypothetical protein	8.44915e-06
1.98054	SO3349		glutathione peroxidase	Cellular Processes	0.0113539
2.14735	SO3383		transcriptional regulator-related protein	Unknown Function	0.00074342
1.97018	SO3386		conserved hypothetical protein	Unknown Function	9.30544e-05
1.62279	SO3403		ribosomal subunit interface protein	Protein Synthesis	0.00124198
1.84553	SO3409		OsmC/Ohr family protein	Unknown Function	6.83311e-07
4.83551	SO3410		hypothetical protein	hypothetical protein	4.3298e-51
1.4766	SO3417		peptidyl-prolyl cis-trans isomerase SlyD	Protein Fate	0.00571738
1.22011	SO3420	*	monoheme cytochrome c	Energy Metabolism	0.0474284
1.5957	SO3422		ribosomal subunit interface protein	Protein Synthesis	0.0004505
2.8807	SO3426	*	carbon storage regulator	Regulatory Functions	1.3573e-20
2.20122	SO3430	*	recA protein	DNA Metabolism	6.808e-11
1.54395	SO3462	*	DNA repair protein RecN	DNA Metabolism	0.00086113
1.89855	SO3466	*	riboflavin synthase	Biosynthesis of cofactors; prosthetic groups; and carriers	3.54563e-06
1.23973	SO3467		3,4-dihydroxy-2-butanone 4-phosphate synthase/GTP cyclohydrolase II, putative	Biosynthesis of cofactors; prosthetic groups; and carriers	0.0482942
1.29029	SO3471		GlyA	Biosynthesis of cofactors; prosthetic groups; and carriers	0.0240045
-1.5695	SO3474		metallo-beta-lactamase family protein	Unknown Function	6.89743e-05
-1.67247	SO3505		N-acetylglucosamine-6-phosphate deacetylase	Central intermediary metabolism	0.00178346
-2.76573	SO3510	*	methyl-accepting chemotaxis protein	Cellular Processes	1.24451e-05
1.21452	SO3517	*	NADH dehydrogenase	Energy Metabolism	0.021705
2.00565	SO3519	*	nitrogen regulatory protein P-II 1	Regulatory Functions	4.27747e-06
1.24738	SO3521	*	type IV pilus biogenesis protein	Cell Envelope	0.0159442
1.47465	SO3523		hypothetical protein	Cell Envelope	0.00119792
1.40284	SO3524	*	type IV pilus biogenesis protein PilE	Cell Envelope	0.00191264
1.81389	SO3525	*	type IV pilin biogenesis protein	Cell Envelope	2.4109e-06
1.27818	SO3526		hypothetical protein	Cell Envelope	0.0161688
1.3181	SO3527	*	hypothetical protein	Cell Envelope	0.00496375
1.96465	SO3528	*	hypothetical protein (has pilD dependent leader)	Cell Envelope	8.61656e-07
3.11412	SO3537	*	ribosomal protein S20	Protein Synthesis	2.5568e-10
2.1597	SO3538	*	transcriptional regulator HlyU	Regulatory Functions	8.36464e-07
3.12506	SO3545		ompA family protein	Cell Envelope	9.0407e-19
2.1009	SO3549		Conserved protein	Unknown Function	4.19112e-08
-1.03265	SO3561		conserved hypothetical protein	conserved hypothetical protein	5.35683e-05
2.44399	SO3577	*	clpB protein	Protein Fate	1.85343e-05
2.00045	SO3580		DNA uptake lipoprotein	conserved hypothetical protein	1.40778e-05
1.55743	SO3597		Conserved protein	Unknown Function	0.0134702
-1.31256	SO3599	*	sulfate ABC transporter	Transport and Binding Protein	1.65625e-06
-1.26744	SO3600	*	sulfate ABC transporter	Transport and Binding Protein	0.0162603
1.82047	SO3649		GTP-binding protein	Unknown Function	3.21937e-05
2.01226	SO3651	*	ribosomal protein L27	Protein Synthesis	6.79e-06
3.14358	SO3652	*	ribosomal protein L21	Protein Synthesis	7.5201e-14
-1.17832	SO3662		FixG-related protein (1 CXXCXXXC motif at 304)	Energy Metabolism	3.76988e-06
3.2994	SO3681	*	universal stress protein family	Cellular Processes	3.7791e-13
2.69908	SO3682		Conserved protein; chromosomally linked to universal stress protein family gene	Unknown Function	1.5866e-10
-1.92227	SO3692	*	ABC transporter	Transport and Binding Protein	0.00227484
-1.30988	SO3693		hypothetical protein	hypothetical protein	1.20293e-06
-1.36747	SO3697		steroid delta-isomerase domain protein	Unknown Function	0.0181718
-1.0411	SO3701		bax protein	Unknown Function	0.00303448
1.81704	SO3715		oxygen-insensitive NAD(P)H nitroreductase	Unknown Function	0.0024129
-1.20301	SO3747	*	Sodium/hydrogen exchanger family/TrkA potassium uptake protein	Transport and Binding Protein	4.16398e-06
3.1046	SO3764		Conserved protein in bacteria	Unknown Function	5.7758e-13
3.3609	SO3765		PspA/IM30 family protein	conserved hypothetical protein	3.3797e-21
1.34111	SO3772		Conserved protein with SH3 domain	conserved hypothetical protein	0.00868597
-1.04988	SO3786		hypothetical protein	Unknown Function	0.00040539
-1.64784	SO3790	*	conserved hypothetical protein	Protein Synthesis	0.0100023
-1.02308	SO3795		conserved hypothetical protein	conserved hypothetical protein	0.0035044
-1.22617	SO3801	*	ABC transporter	Transport and Binding Protein	0.0144052
1.36395	SO3805		UDP-N-acetylmuramate:L-alanyl-gamma-D-glutamyl-meso-diaminopimelate ligase	Cell Envelope	0.0142388
-1.07498	SO3807		sterol desaturase family protein	Unknown Function	0.0106845
1.45543	SO3813		hypothetical protein	hypothetical protein	0.0106197
-1.5701	SO3814	*	ampG protein	Transport and Binding Protein	0.00454177
-1.48859	SO3820	*	ammonium transporter	Transport and Binding Protein	0.0156849
-1.04601	SO3831		acetyltransferase	Unknown Function	1.96472e-05
1.77334	SO3842		Conserved protein	Unknown Function	0.0103739
-1.01952	SO3849		conserved domain protein	hypothetical protein	0.00172527
-1.10133	SO3859		cyclic nucleotide phosphodiesterase	Regulatory Functions	5.06961e-05
-1.80439	SO3870	*	disulfide bond formation protein	Protein Fate	1.6742e-11
-1.02997	SO3871	*	thiol:disulfide interchange protein	Protein Fate	0.00186747
-1.35056	SO3872		arylsulfate sulfotransferase	Central intermediary metabolism	0.00387089
-2.46266	SO3873		hypothetical protein	hypothetical protein	2.19781e-05
-1.17766	SO3884	*	site-specific recombinase	DNA Metabolism	0.00069632
-1.13125	SO3885		ATPase	Unknown Function	5.19378e-06
-2.28964	SO3886		hypothetical protein	hypothetical protein	0.00414167
2.45042	SO3888		Conserved protein	Unknown Function	0.00094237
-1.19865	SO3894	*	sensor histidine kinase	Signal Transduction	2.28563e-05
4.47466	SO3896	*	outer membrane porin (Shewanella frigidimarina porin)	Transport and Binding Protein	1.6072e-15
1.638	SO3904		type I secretion outer membrane protein	Transport and Binding Protein	1.85343e-05
1.32642	SO3905		Conserved protein	Unknown Function	0.0145139
1.56008	SO3907		Protein conserved in bacteria	conserved hypothetical protein	0.00051603
2.12957	SO3915		Inhibitor of MCP methylation	conserved hypothetical protein	5.80311e-06
-1.43377	SO3924		conserved hypothetical protein	hypothetical protein	1.89812e-05
-2.32135	SO3925		COG0502: Biotin synthase and related enzymes	Unknown Function	0.00027213
3.05895	SO3927	*	ribosomal protein L9	Protein Synthesis	1.0046e-12
2.49748	SO3928	*	ribosomal protein S18	Protein Synthesis	1.70061e-05
2.62021	SO3929		primosomal replication protein n	DNA Metabolism	3.8338e-15
2.93103	SO3930	*	ribosomal protein S6	Protein Synthesis	1.0507e-16
-1.33574	SO3933	*	membrane protein	Cell Envelope	0.00734419
1.4828	SO3935	*	ribonuclease R	Transcription	0.0184095
1.51682	SO3936		sodium-type flagellar protein MotX	Transport and Binding Protein	0.00089457
2.41352	SO3937		adenylosuccinate synthetase	Purines; Pyrimidines; Nucleosides; and Nucleotides	1.7344e-10
1.89247	SO3939		ribosomal protein S9	Protein Synthesis	2.56644e-06
2.96899	SO3940	*	ribosomal protein L13	Protein Synthesis	2.1235e-16
1.64378	SO3950		SpoIIAA family protein	Unknown Function	0.0126249
1.53715	SO3951		ABC-type transporter	conserved hypothetical protein	0.00207852
2.48053	SO3962		putative sigma-54 modulation factor	Protein Synthesis	1.47411e-08
2.04101	SO3963		nitrogen regulatory IIA protein	Transport and Binding Protein	1.33619e-09
-2.05282	SO3979		conserved domain protein	hypothetical protein	0.00027908
-1.17197	SO3981	*	nitrate/nitrite sensor protein NarQ (NarL family)	Signal Transduction	8.77445e-07
1.41681	SO3988	*	aerobic respiration control protein ArcA	Signal Transduction	0.019517
-1.12214	SO3996		hypothetical protein	hypothetical protein	0.00067908
-1.66005	SO4004	*	proton/glutamate symporter	Transport and Binding Protein	0.0251911
1.77262	SO4028		single-strand binding protein	DNA Metabolism	7.92649e-06
-1.33269	SO4068		Expressed protein in Shewanella	conserved hypothetical protein	7.51142e-05
-1.08492	SO4075		hypothetical protein	Transport and Binding Protein	9.56381e-06
-1.04498	SO4077		TonB-dependent receptor	Transport and Binding Protein	4.84173e-05
1.42426	SO4079		Conserved protein in bacteria	Unknown Function	0.00208257
-1.03895	SO4081		amino acid permease	Transport and Binding Protein	0.00056854
1.48038	SO4098		rod shape-determining protein MreB	Cell Envelope	0.00392335
2.43675	SO4105	*	MSHA pilin protein MshA (major pilin subunit)	Cellular Processes	1.21616e-09
1.91871	SO4106	*	MSHA pilin protein MshB (minor pilin)	Cellular Processes	0.00030974
1.38056	SO4133		uridine phosphorylase	Purines; Pyrimidines; Nucleosides; and Nucleotides	0.0201524
3.77251	SO4134		Conserved protein in bacteria	Unknown Function	1.6604e-23
-2.74118	SO4142	*	hypothetical monoheme cytochrome c	Energy Metabolism	0.00575669
-1.21232	SO4147	*	toxin secretion ATP-binding protein	Transport and Binding Protein	4.30766e-05
-1.70356	SO4173	*	sensor histidine kinase (prrB homolog)	Signal Transduction	0.00814575
1.28207	SO4190		inorganic pyrophosphatase	Central intermediary metabolism	0.0226662
-1.34895	SO4195		PAP2 family protein	Unknown Function	3.93665e-05
2.02296	SO4197	*	S-adenosylmethionine:2-demethylmenaquinone methyltransferase	Biosynthesis of cofactors; prosthetic groups; and carriers	1.10576e-06
3.2583	SO4202	*	Sec-independent protein translocase protein TatA	Protein Fate	1.0908e-30
1.97007	SO4203	*	Sec-independent protein translocase protein TatB	Protein Fate	3.21685e-08
1.33496	SO4211		preprotein translocase	Protein Fate	0.0265387
1.31447	SO4212		subfamily M23B unassigned peptidases	Protein Fate	0.0167221
2.41031	SO4214		UDP-3-0-acyl N-acetylglucosamine deacetylase	Cell Envelope	5.985e-13
2.4248	SO4215		cell division protein FtsZ	Cellular Processes	2.66718e-07
1.57645	SO4216		cell division protein FtsA	Cellular Processes	0.00011343
1.27049	SO4217		cell division protein FtsQ	Cellular Processes	0.0264903
1.55947	SO4221		UDP-N-acetylmuramoylalanine--D-glutamate ligase	Cell Envelope	0.00035483
1.62534	SO4226		cell division protein FtsL	Cellular Processes	0.00754925
1.81214	SO4228		conserved hypothetical protein TIGR00242	Unknown Function	0.00028576
1.48797	SO4229		hypothetical protein	hypothetical protein	0.0009029
2.27729	SO4247	*	ribosomal protein L28	Protein Synthesis	1.7344e-10
1.49452	SO4248	*	DNA repair protein RadC	DNA Metabolism	0.0005194
-1.32712	SO4261		hypothetical protein	hypothetical protein	7.81652e-06
-1.37334	SO4283	*	apbE family protein	Cell Envelope	0.00015278
-2.39859	SO4291	*	phosphate ABC transporter	Transport and Binding Protein	0.0116643
-1.62534	SO4292	*	phosphate ABC transporter	Transport and Binding Protein	2.29176e-08
1.4072	SO4310		lipoprotein LppL	Unknown Function	0.00280903
1.54273	SO4329		Conserved protein in bacteria	Unknown Function	0.00086113
-1.58382	SO4333		hypothetical protein	hypothetical protein	2.80054e-09
-2.37264	SO4339	*	sodium-dependent transporter	Transport and Binding Protein	2.9549e-10
-1.16784	SO4350		transcriptional regulator ilvY	Regulatory Functions	1.748e-05
-1.14413	SO4353		hypothetical protein	Transport and Binding Protein	0.0106872
-1.29693	SO4355	*	hypothetical protein	Regulatory Functions	6.4617e-07
-1.63415	SO4360	*	MtrAD-like decaheme cytochrome c	Energy Metabolism	0.00010898
-1.47466	SO4361		small uncharcterized protein associated with dimethyl sulfoxide reductase 2	hypothetical protein	1.56998e-09
-1.35925	SO4362	*	Chaperone for interaction of DmsA-2 with tatB and tatC	Protein Synthesis	1.85343e-05
1.25739	SO4368		acyl carrier protein	Fatty acid and phospholipid metabolism	0.0369591
-2.2761	SO4372		thioester dehydrase family protein	Fatty acid and phospholipid metabolism	5.37834e-06
-1.76994	SO4385		von Willebrand factor type A domain protein	Unknown Function	8.7311e-14
1.73673	SO4396		acyl carrier protein phosphodiesterase	Fatty acid and phospholipid metabolism	0.00194537
1.35329	SO4399		Conserved protein	Unknown Function	0.0227582
-1.23432	SO4420	*	subfamily M23B unassigned peptidases	Protein Fate	0.0002759
1.75608	SO4450	*	molybdenum synthase component D	Biosynthesis of cofactors; prosthetic groups; and carriers	0.00092758
1.7976	SO4452	*	molybdenum cofactor biosynthesis protein A	Biosynthesis of cofactors; prosthetic groups; and carriers	1.49475e-05
-1.63605	SO4474		hypothetical protein	hypothetical protein	0.00549647
1.54219	SO4485	*	diheme cytochrome c	Energy Metabolism	0.00454177
1.28907	SO4492		Conserved protein in bacteria	Unknown Function	0.0193587
-1.37887	SO4493		conserved hypothetical protein	conserved hypothetical protein	0.00734419
-1.4772	SO4498		Conserved protein in Shewanella	hypothetical protein	3.08043e-06
1.63542	SO4508		Formate dehydrogenase 1 accessory protein predicted to be secreted by the twin-arginine translcoation pathway	hypothetical protein	0.00566014
-1.05112	SO4519		sodium-dependent transporter	Transport and Binding Protein	9.17372e-05
-1.67691	SO4524	*	transcriptional regulator	Regulatory Functions	0.00887751
-1.10669	SO4528		conserved hypothetical protein	hypothetical protein	2.12179e-06
-1.33895	SO4537	*	subfamily S9C unassigned peptidases	Protein Fate	0.00163142
-1.3714	SO4542	*	transcriptional regulator	Regulatory Functions	2.75877e-06
-2.28283	SO4576		O-succinylbenzoic acid--CoA ligase	Biosynthesis of cofactors; prosthetic groups; and carriers	6.2917e-16
1.60053	SO4591	*	CymA	Energy Metabolism	0.00111697
2.46908	SO4594		hypothetical protein	hypothetical protein	3.46211e-08
1.56982	SO4603	*	LexA repressor	Regulatory Functions	0.0374294
-1.04119	SO4617	*	DNA-damage-inducible protein F	DNA Metabolism	0.00187429
-1.28663	SO4621		hypothetical protein (OM)	hypothetical protein	0.00078004
-1.33137	SO4622	*	sensor histidine kinase (has CXXC)	Signal Transduction	6.97782e-06
-1.70699	SO4626		bioH protein	Biosynthesis of cofactors; prosthetic groups; and carriers	0.00022286
1.481	SO4627		conserved Shewanella protein	hypothetical protein	0.00075426
-1.09107	SO4636	*	lipoprotein	Cell Envelope	0.00023353
-1.36184	SO4651		Conserved protein in bacteria	Unknown Function	3.00884e-07
-2.26542	SO4653	*	sulfate ABC transporter	Transport and Binding Protein	0.00092758
-2.27408	SO4676		3-deoxy-D-manno-octulosonic-acid (KDO) transferase	Cell Envelope	1.8774e-20
-1.05235	SO4708		conserved hypothetical protein	conserved hypothetical protein	0.00045394
1.76251	SO4730	*	oxygen-independent coproporphyrinogen III oxidase	Biosynthesis of cofactors; prosthetic groups; and carriers	0.00021876
1.94706	SO4740		conserved hypothetical protein	conserved hypothetical protein	0.0234243
-1.47074	SO4741		family C44 non-peptidase homologues (glucosamine--fructose-6-phosphate aminotransferase)	Central intermediary metabolism	0.0458996
2.01863	SO4748	*	ATP synthase F1	Energy Metabolism	2.92393e-07
2.29192	SO4749	*	ATP synthase F1	Energy Metabolism	1.92959e-07
1.81347	SO4750	*	ATP synthase F1	Energy Metabolism	0.00097756
1.74611	SO4751	*	ATP synthase F0	Energy Metabolism	0.00432298
1.81204	SO4752	*	ATP synthase F0	Energy Metabolism	0.00229983
2.25591	SO4753	*	ATP synthase F0	Energy Metabolism	4.12568e-06
1.82159	SO4754	*	ATP synthase protein I	Energy Metabolism	0.00549927
